# Supplementary material
Source: PubMed Central journal article supplement (PMC7054732)
Supplement: mmc1.pdf [file mmc1.pdf]

## **Supplemental Information**

### **Targeting SOX2 Protein with Peptide**

#### **Aptamers for Therapeutic Gains**

#### **against Esophageal Squamous Cell Carcinoma**

**Kuancan Liu, Fuan Xie, Tingting Zhao, Rui Zhang, Anding Gao, Yunyun Chen, Haiyan Li, Shihui Zhang, Zhangwu Xiao, Jieping Li, Xiaoqian Hong, Lei Shang, Weifeng Huang, Junkai Wang, Wael El-Rifai, Alexander Zaika, Xi Chen, Jianwen Que, and Xiaopeng Lan**

## Supplemental Information.

### Figure S1. Establishment of a peptide aptamer library for screening based on BiFc.

(A) Schematics of aptamer library construction and screening process.

(B) TrxA-MCS-TrxA fragment and pBiFc-VC155-TrxA-MCS-TrxA vector were generated after high-fidelity PCR, ligation and enzyme identification.

(C) A peptide aptamer expression library containing 33 random nucleotide sequences was obtained with high-fidelity PCR.

(D) The peptide aptamer library was validated with bacterial liquid PCR using specific primers.

(E) Constructs expressing SOX2 protein and peptide aptamers used for immunoprecipitation validation.

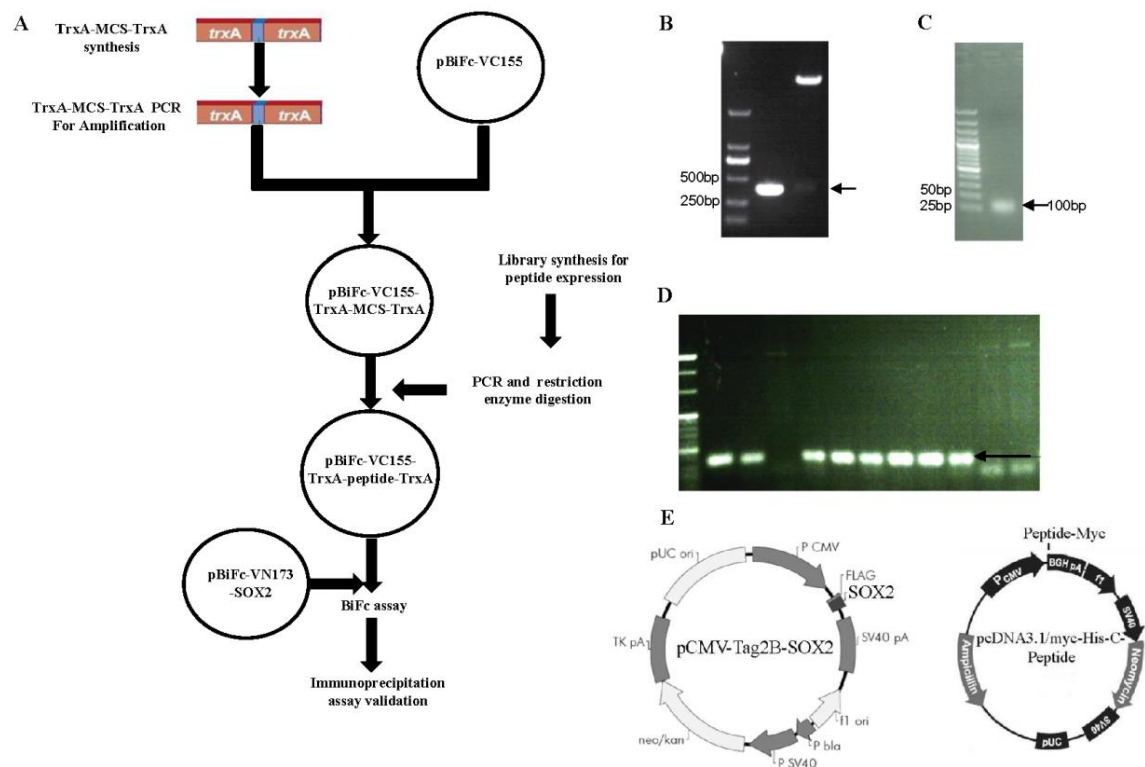

**Figure S2. Production of lentivirus that is used to express peptide aptamers P15, P18, P42 and GFP.** Note that control contains GFP and the package cell line is HEK293T. Scale bar: 100  $\mu\text{m}$ .

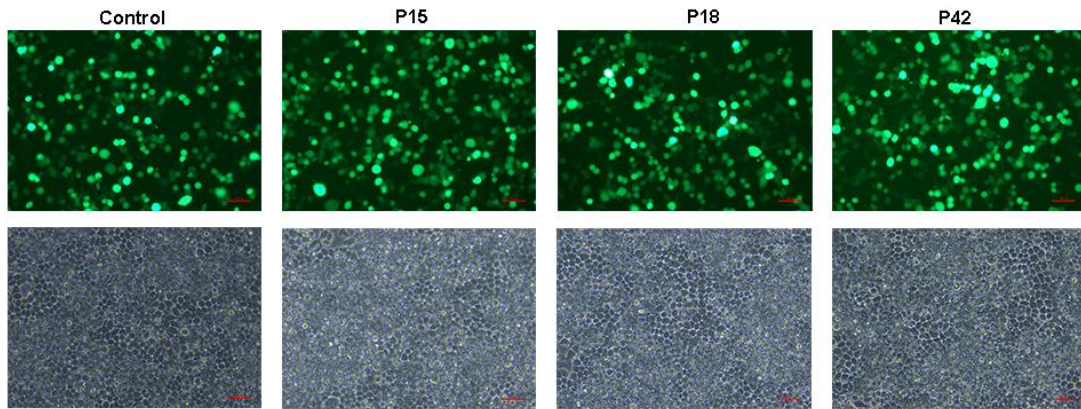



**Figure S4. P42 aptamer overexpression does not impact the proliferation and apoptosis of normal esophageal epithelial cell lines (EPC2 and HEEC). Note apoptotic cells are rarely detected in EPC2 control and p42 overexpression groups (C).**

Scale bar: 100  $\mu$ m.

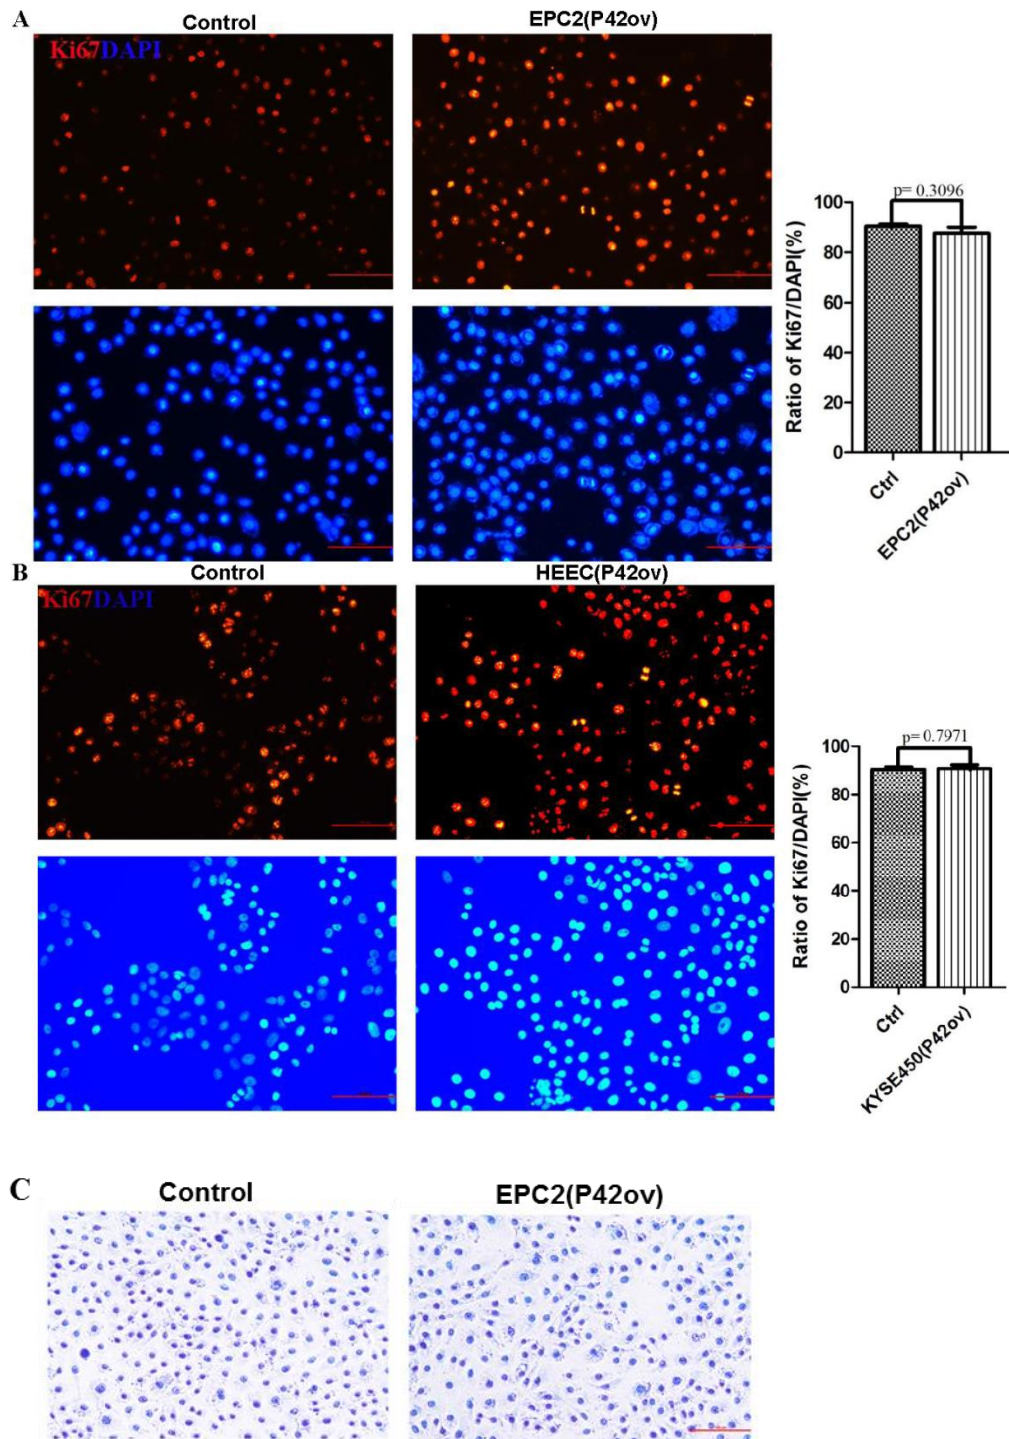

**Supplementary Table S1. The clinicopathological characteristics of 75 ESCCs are closely correlated with the levels of SOX2 protein.**

|                         |         | Cases in each group | Percent |
|-------------------------|---------|---------------------|---------|
| Histopathological grade | I       | 11                  | 14.7%   |
|                         | I-II    | 14                  | 18.7%   |
|                         | II      | 34                  | 45.3%   |
|                         | II-III  | 5                   | 6.7%    |
|                         | III     | 11                  | 14.7%   |
| TNM Stage               | T Stage | 24                  | 32%     |
|                         | N Stage | 46                  | 61.3%   |
|                         | M Stage | 5                   | 6.7%    |

**Supplementary Table S2. Primers used for lentiviral plasmid construction**

| Lentiviral plasmid                                        | Primer sequence(5'-3')                                        |
|-----------------------------------------------------------|---------------------------------------------------------------|
| For<br>pCDH-CMV-Oligo-<br>IRES-GFP-Puro<br>construction   | Forward:5'-CTAGAGCTAGCGAATTCTTCGAAACCGGTGATATCC<br>TCGAGG-3'  |
|                                                           | Reverse:5'-GATCCCTCGAGGATATCACCGGTTTCGAAGAATTCCG<br>CTAGCT-3' |
| For<br>pCDH-CMV-Peptide-<br>IRES-GFP-Puro<br>construction | Forward:5'-CGGAATTCGCCACCATGAGCGATAAAATTATTCAC-3'             |
|                                                           | Reverse: 5'-CGGGATCCTCACAGGTTAGCGTCGAGGAA-3'                  |

**Supplementary Table S3. The most prominent biological process, cellular component and molecular function of changed protein upon ectopic expression of P42 aptamer.**

|                               | <b>Biological Process</b> | <b>Cellular Component</b> | <b>Molecular Function</b>     |
|-------------------------------|---------------------------|---------------------------|-------------------------------|
| <b>Up-regulated Protein</b>   | cellular process          | cell                      | binding                       |
|                               | single-organism process   | organelle                 | catalytic activity            |
|                               | biological regulation     | extracellular region      | molecular function regulator  |
|                               | metabolic process         | membrane                  | signal transducer activity    |
|                               | response to stimulus      | membrane-enclosed lumen   | structural molecule activity  |
| <b>Down-regulated Protein</b> | cellular process          | cell                      | binding                       |
|                               | single-organism process   | organelle                 | catalytic activity            |
|                               | biological regulation     | membrane                  | molecular function regulator  |
|                               | metabolic process         | extracellular region      | molecular transducer activity |
|                               | response to stimulus      | membrane-enclosed lumen   | transporter activity          |



**Supplementary Table S4. The detailed information of chemically synthetic control peptide and peptide 42.**

|           | Control peptide                                                                   | Peptide 42                                                                         |
|-----------|-----------------------------------------------------------------------------------|------------------------------------------------------------------------------------|
| Sequence  | <b>TAMRA-YGRKKRRQRRRCGPV</b><br><b>WISLARGPC(C12-C24)</b>                         | <b>TAMRA-YGRKKRRQRRRCGPVWFSTLFFPLF</b><br><b>FLISLARGPC(C12-C35)</b>               |
| Structure | 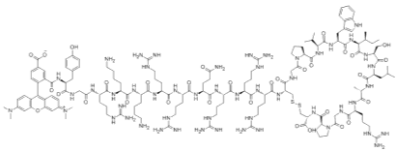 |  |

**Supplementary Table S5. Primers used for peptide library construction and BiFc**

|                                                    | sequence(5'-3')                                                                                                                                                                                                                                                                                                                                                                                              |
|----------------------------------------------------|--------------------------------------------------------------------------------------------------------------------------------------------------------------------------------------------------------------------------------------------------------------------------------------------------------------------------------------------------------------------------------------------------------------|
| Synthesized Sequence for TrxA-MCS-TrxA             | 5'-ATGAGCGATAAAAATTATTCACCTGACTGACGACAGTTTTGACACGGATGTA CTCAAAGCGGACGGGGCGATCCTCGTCGATTTCTGGGCAGAGTGGTGCGGTCCAGTGTGCTGGGCCCAGCCGGCCAGATCTGAGCTCGCGGCCGCGATATCGCTAGCTCGAGGTCCGTGCAAAATGATCGCCCCGATTCTGGATGAAATCGCTGACGAATATCAGGGCAAACCTGACCGTTGCAAAACTGAACATCGATCAAAACCCTGGCACTGCGCCGAAATATGGCATCCGTGGTATCCCGACTCTGCTGCTGTTCAAAAACGGTGAAGTGGCGGCAACCAAAGTGGGTGCACTGTCTAAAGGTCAGTTGAAAGAGTTCCTCGACGCTAACCTG-3' |
| For pBiFc-VC155-TrxA-MCS-TrxA construction         | Forward: 5'- <u>ACGCGTCGACCATGAGCGATAAAAATTATTCAC</u> -3'                                                                                                                                                                                                                                                                                                                                                    |
|                                                    | Reverse: 5'- <u>GGGTACCCAGGTTAGCGTCGAGGAA</u> -3'                                                                                                                                                                                                                                                                                                                                                            |
| Synthesized random sequence for peptide expression | 5'-CTGCAGA <u>ACCAGTGTGCTGGN32GATATCGCTAGCTCGAGC</u> -3'                                                                                                                                                                                                                                                                                                                                                     |
| For random sequence cloning                        | Forward: 5'-CTGCAGA <u>ACCAGTGTGCT</u> -3'                                                                                                                                                                                                                                                                                                                                                                   |
|                                                    | Reverse: 5'- <u>GCTCGAGCTAGCGATATC</u> -3'                                                                                                                                                                                                                                                                                                                                                                   |
| For pBiFc-VC155-TrxA-peptide-TrxA identification   | Forward: 5'-TGCGGTCCAGTGTGCTGG-3'                                                                                                                                                                                                                                                                                                                                                                            |
|                                                    | Reverse: 5'-ACCTCGA GCTAGCGATATC-3'                                                                                                                                                                                                                                                                                                                                                                          |
| For pBiFc-VN173-SOX2 construction                  | Forward: 5'- <u>CGAATTCAATGTACAACATGATGGAGAC</u> -3'                                                                                                                                                                                                                                                                                                                                                         |
|                                                    | Reverse: 5'- <u>TGCTCTAGACATGTGTGAGAGGGGCAG</u> -3'                                                                                                                                                                                                                                                                                                                                                          |

**Supplementary Table S6. Primers used for immunoprecipitation**

|                                                             | sequence(5'-3')                                           |
|-------------------------------------------------------------|-----------------------------------------------------------|
| For pcDNA3.1-myc-hisC-<br>TrxA-Peptide-TrxA<br>construction | Forward:5'-cg <u>GGATCCA</u> ACCATGAGCGATAAAAATTATTCAC-3' |
|                                                             | Reverse:5'- <u>CGGAATTC</u> CCAGGTTAGCGTCGAGGAA-3'        |
| For pCMV-Tag2B-SOX2<br>construction                         | Forward: 5'- <u>CGGAATTC</u> ATGTACAACATGATGGAGACG-3'     |
|                                                             | Reverse: 5'- <u>CCCAAGCTT</u> TCACATGTGTGAGAGG GGCA-3'    |
